# Supplementary material for: Intrinsic Exercise Capacity Affects Glycine and Angiotensin-Converting Enzyme 2 (ACE2) Levels in Sedentary and Exercise Trained Rats
Source: MDPI journal article supplement (doi:10.3390/metabo12060548), 2022-06-15
Supplement: s1 [file s1]

## Supplemental Material

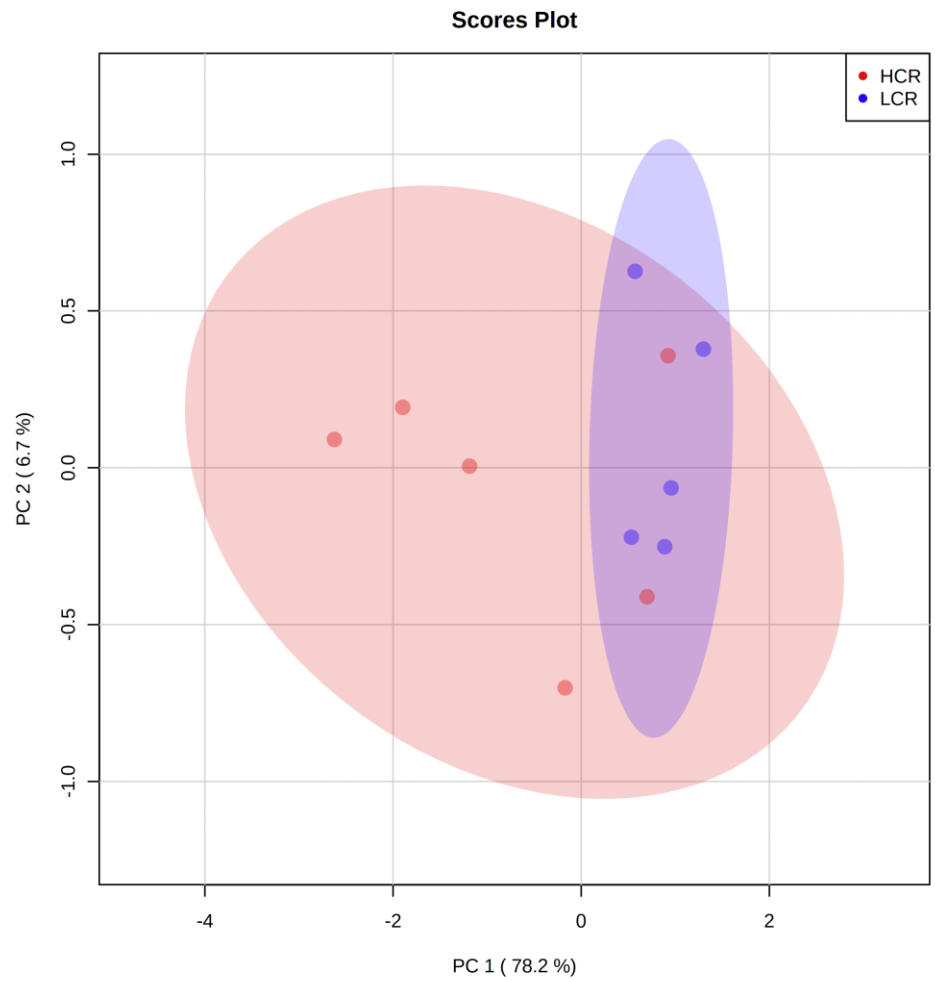

**Figure S1. PCA of the LC-MS data.** Unsupervised principal component analysis (PCA) of rats selectively bred for HCR (red) and LCR (blue). Except for two HCR rats, the first PCA separates the groups with a variance of 78.2%.

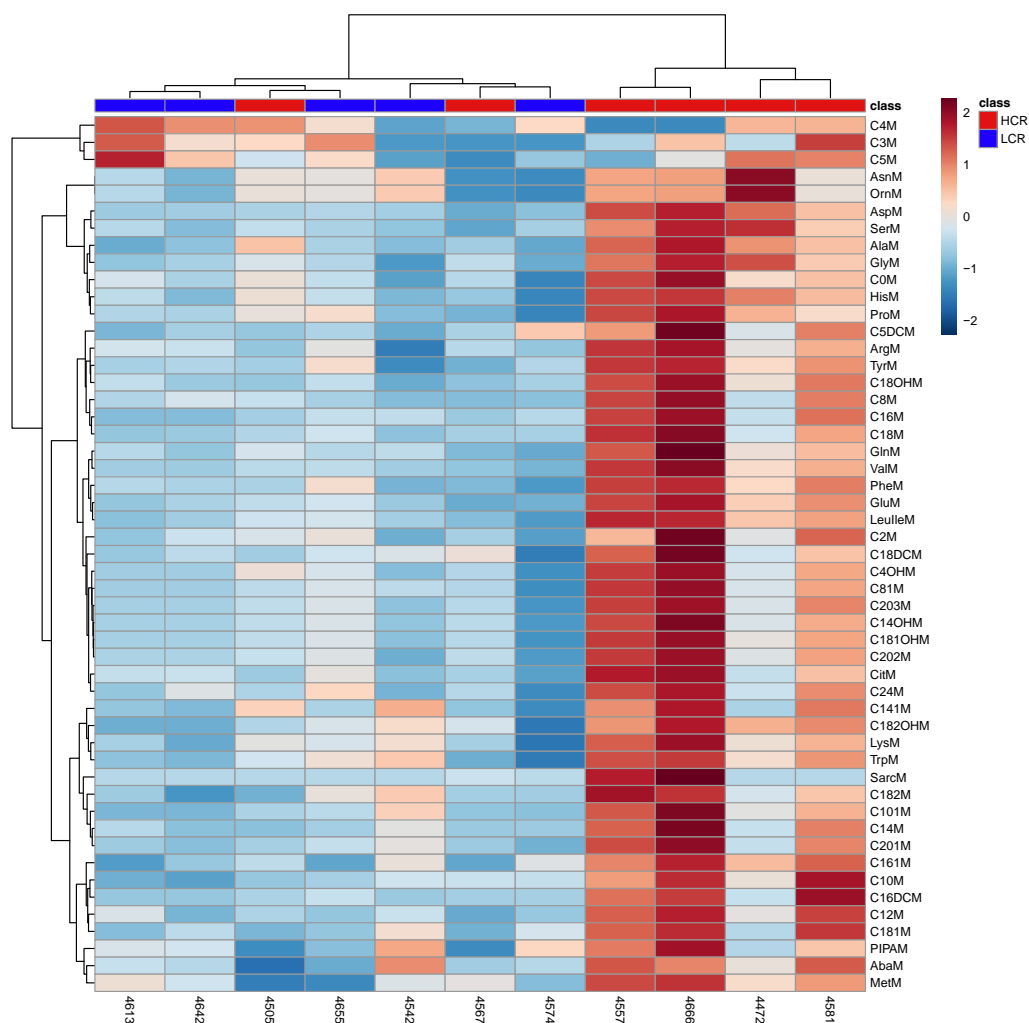

**Figure S2. Hierarchical cluster analysis of the LC-MS data.** Heatmap show the differences between the metabolites for each sample and groups (red: HCR, blue: LCR). Each sample is represented in a single column and each metabolite is displayed by a single row. Red colors show higher metabolite concentrations, while blue colors indicate reduced metabolite concentrations. The two HCR samples 4505 and 4567 display the same behaviour as the LCR samples. Sample 4472 differs from the other HCR samples in the majority of genes. Distance measurements were performed using the Euclidean method and clustering was conducted using Ward's method with minimal variance.

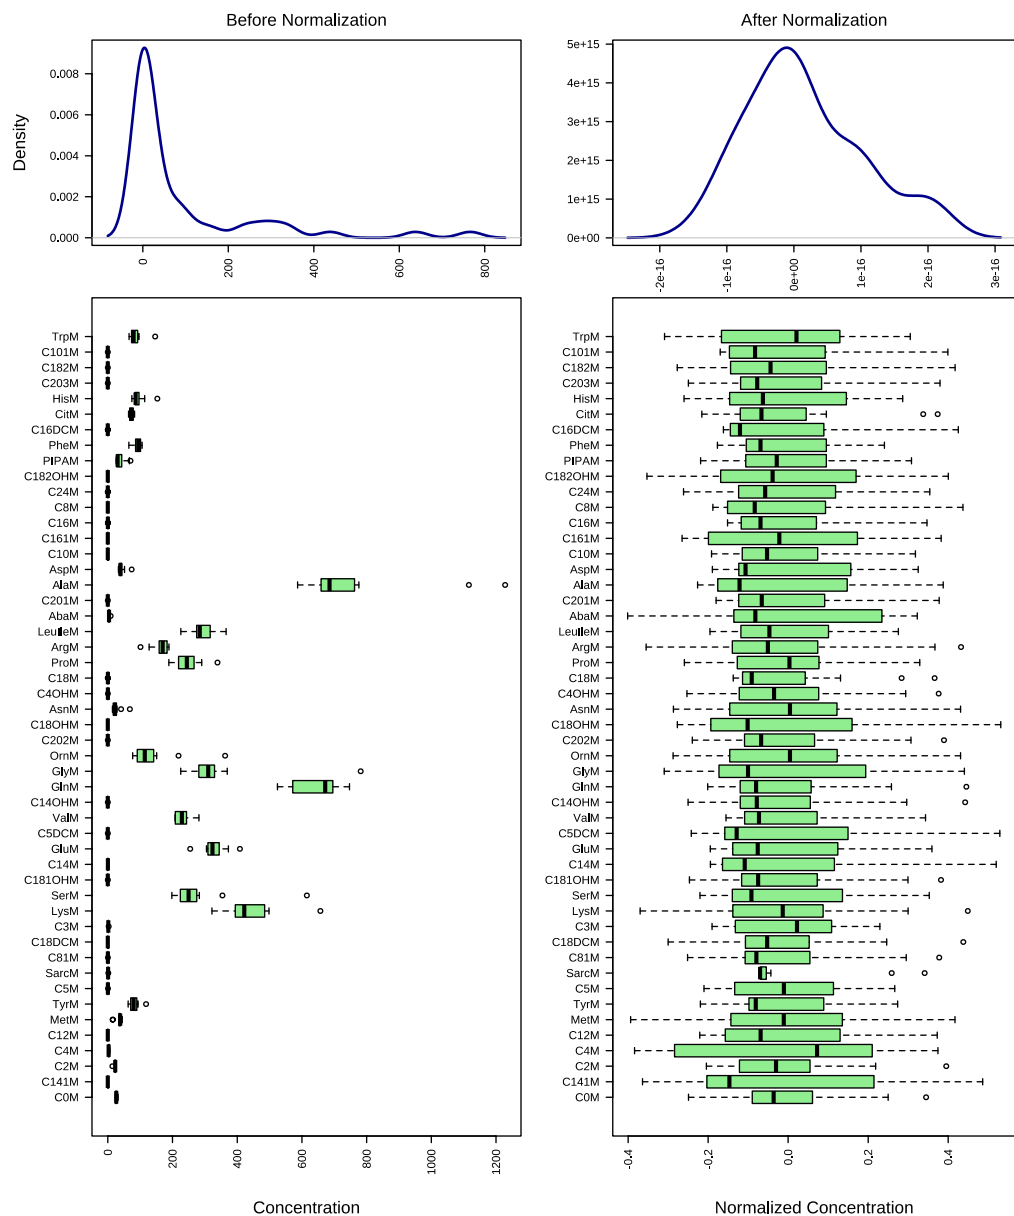

**Figure S3. Effects of the LC-MS data before and after normalization.** Kernel density (top) of the metabolite concentrations and box plots (bottom) before and after normalization by the sample median, log transformation and centering by the mean. The density plots are based on all samples and the boxplots show at most 50 features.

**Table S1. Upregulated metabolites in HCR compared to LCR.** Seven metabolites are upregulated in HCR vs. LCR considering a p-value < 0.1 and a fold change (FC)  $\geq |2|$ .

| Metabolites | FC     | log2(FC) | p-value   | -log10(p-value) |
|-------------|--------|----------|-----------|-----------------|
| AlaM        | 2.3084 | 1.2069   | 0.0026608 | 2.575           |
| GlyM        | 2.6304 | 1.3953   | 0.005358  | 2.271           |
| C182OHM     | 2.0067 | 1.0048   | 0.022074  | 1.6561          |
| LysM        | 2.0031 | 1.0022   | 0.042331  | 1.3733          |
| C16DCM      | 2.0425 | 1.0304   | 0.056574  | 1.2474          |
| C18OHM      | 2.4439 | 1.2892   | 0.065056  | 1.1867          |
| C141M       | 2.0134 | 1.0096   | 0.087503  | 1.058           |

AlaM, Alanine; GlyM, Glycine; LysM, Lysine; C141M, Tetradecenoylcarnitine; C16DCM, Dicarboxypalmitoylcarnitine; C18OHM, 3-Hydroxy-octadecanoylcarnitine; C182OHM, Hydroxy-octadec-2-enoylcarnitine.
